# Supplementary material for: SARS-CoV-2 infection in free-ranging white-tailed deer
Source: Springer Nature journal article supplement (doi:10.1038/s41586-021-04353-x), 2021-12-23
Supplement: 41586_2021_4353_MOESM3_ESM.xlsx [file 41586_2021_4353_MOESM3_ESM.xlsx]

## Sheet: Sheet1
Sample ID	E assay	N1 assay	N2 assay	Presumptive PCR results	NVSL PCR results	WGS Completed
1	30.2	30.72	29.13	Positive	Positive
2	28.5	29.18	27.65	Positive	Positive
3	29.33	29.65	28.39	Positive	Positive
4	32.18	31.14	30.33	Positive
5	Negative			Negative
6	Negative			Negative
7	28.38	29.47	28.09	Positive	Positive
8	28.63	29.7	27.42	Positive	Positive
9	28.14	28.68	26.85	Positive	Positive
10	17.56	Negative	Negative	Negative
11	35.98	35	34.1	Positive
12	Negative			Negative
13	Negative			Negative
14	Negative			Negative
15	Negative			Negative
16	Negative			Negative
17	Negative			Negative
18	Negative			Negative
19	Negative			Negative
20	Negative			Negative
21	Negative			Negative
22	Negative			Negative
23	Negative			Negative
24	Negative			Negative
25	23.67	24.76	22.73	Positive	Positive	Yes
26	31.06	29.41	31.27	Positive	Positive
27	Negative			Negative
28	Negative			Negative
29	Negative			Negative
30	Negative			Negative
31	32.07	30.85	32.71	Positive
32	Negative			Negative
33	30.88	30.08	31.48	Positive
34	30.57	29.63	31.76	Positive	Positive
35	Negative			Negative
36	Negative			Negative
37	Negative			Negative
38	Negative			Negative
39	Negative			Negative
40	Negative			Negative
41	Negative			Negative
42	Negative			Negative
43	Negative			Negative
44	Negative			Negative
45	Negative			Negative
46	Negative			Negative
47	Negative			Negative
48	Negative			Negative
49	Negative			Negative
50	28.77	29.91	33.86	Positive	Positive
51	Negative			Negative
52	Negative			Negative
53	Negative			Negative
54	Negative			Negative
55	Negative			Negative
56	Negative			Negative
57	25.21	26.49	29.85	Positive	Positive	Yes
58	25.23	26.91	29.81	Positive	Positive	Yes
59	Negative			Negative
60	Negative			Negative
61	Negative			Negative
62	Negative			Negative
63	Negative			Negative
64	Negative			Negative
65	Negative			Negative
66	Negative			Negative
67	Negative			Negative
68	31	28.93	30.36	Positive	Positive
69	30.49	28.82	30.42	Positive	Positive
70	30.27	28.3	29.81	Positive	Positive
71	31.64	30.08	32.68	Positive
72	Negative			Negative
73	28.84	27.08	28.49	Positive	Positive
74	29.29	28.18	30.8	Positive	Positive
75	32.38	30.57	32.09	Positive
76	Negative			Negative
77	Negative			Negative
78	33.32	31.91	34.14	Positive		Yes
79	24.55	25.1	26.74	Positive	Positive	Yes
80	Negative			Negative
81	Negative			Negative
82	Negative			Negative
83	32.97	30.96	33.44	Positive
84	31.61	29.91	31.04	Positive	Positive
85	Negative			Negative
86	Negative			Negative
87	Negative			Negative
88	24.28	22.62	23.96	Positive	Positive
89	Negative			Negative
90	Negative			Negative
91	Negative			Negative
92	Negative			Negative
93	Negative			Negative
94	Negative			Negative
95	Negative			Negative
96	Negative			Negative
97	Negative			Negative
98	Negative			Negative
99	Negative			Negative
100	Negative			Negative
101	Negative			Negative
102	Negative			Negative
103	Negative			Negative
104	Negative			Negative
105	Negative			Negative
106	Negative			Negative
107	Negative			Negative
108	Negative			Negative
109	18.57	16.79	18.75	Positive	Positive	Yes
110	39.87	Negative	Negative	Negative
111	Negative			Negative
112	Negative			Negative
113	Negative			Negative
114	Negative			Negative
115	Negative			Negative
116	33.17	34.38	35.19	Positive
116	Negative			Negative
117	Negative			Negative
118	Negative			Negative
119	Negative			Negative
120	Negative			Negative
121	Negative			Negative
122	Negative			Negative
123	Negative			Negative
124	Negative			Negative
125	Negative			Negative
126	Negative			Negative
127	Negative			Negative
128	Negative			Negative
129	Negative			Negative
131	32.96	32.89	35	Positive
132	29.74	29.62	31.97	Positive	Positive
133	Negative			Negative
134	Negative			Negative
135	27.64	27.23	29.24	Positive	Positive
136	29.25	28.67	30.53	Positive	Positive
137	27.08	26.62	29.62	Positive	Positive
138	Negative			Negative
139	Negative			Negative
140	Negative			Negative
141	26.17	26.74	28.55	Positive	Positive	Yes
142	27.91	31.2	32.77	Positive
143	31.25	27.44	29.3	Positive	Positive
144	Negative			Negative
145	Negative			Negative
146	Negative			Negative
147	Negative			Negative
148	Negative			Negative
149	Negative			Negative
150	Negative			Negative
151	Negative			Negative
152	Negative			Negative
153	Negative			Negative
154	30.59	29.24	30.81	Positive	Positive
155	Negative			Negative
156	Negative			Negative
157	Negative			Negative
158	28.18	26.59	28.51	Positive	Positive
159	Negative			Negative
160	Negative			Negative
161	Negative			Negative
162	31.73	30.44	32.82	Positive
163	Negative			Negative
164	Negative			Negative
165	34.03	31.2	33.93	Positive
166	Negative			Negative
167	Negative			Negative
168	31.72	29.53	32.28	Positive	Positive
169	Negative			Negative
170	Negative			Negative
171	Negative			Negative
172	Negative			Negative
173	31.21	29.55	34.14	Positive	Positive
174	Negative			Negative
175	Negative			Negative
176	Negative			Negative
177	Negative			Negative
178	Negative			Negative
179	32.78	31.17	33.66	Positive
180	Negative			Negative
181	Negative			Negative
182	Negative			Negative
183	30.08	28.43	30.49	Positive	Positive
184	Negative			Negative
185	Negative			Negative
186	Negative			Negative
187	31.86	32.98	31.25	Positive
188	29.79	31.02	29.21	Positive	Positive
189	34.93	32.37	33.62	Positive
190	26.63	28.8	25.94	Positive	Positive
191	Negative			Negative
192	Negative			Negative
193	Negative			Negative
194	30.71	33.63	31.48	Positive
195	31.71	31.93	30.36	Positive
196	Negative			Negative
197	Negative			Negative
198	Negative			Negative
199	27.05	27.23	24.82	Positive	Positive
200	Negative			Negative
201	Negative			Negative
202	Negative			Negative
203	Negative			Negative
204	Negative			Negative
205	32.91	33.38	31.59	Positive
206	34.34	33.6	34.12	Positive
207	31.95	34.06	32.82	Positive
208	32.36	33.81	31.63	Positive
209	Negative			Negative
210	27.19	28.62	27.17	Positive	Positive
211	29.37	31	29.87	Positive	Positive
212	27.35	30.96	28.66	Positive	Positive	Yes
213	Negative			Negative
214	31.04	33.32	32.51	Positive
215	Negative			Negative
216	27.16	28.98	27.32	Positive	Positive
289	24.41	25.61	23.65	Positive	Positive
290	29.59	31.49	29.77	Positive	Positive
291	27.27	29	27.61	Positive	Positive
292	31.2	32.56	31.23	Positive
293	30.52	32.28	30.45	Positive
294	Negative			Negative
295	Negative			Negative
296	Negative			Negative
297	30.93	32.9	32.4	Positive
298	29.05	30.66	28.76	Positive	Positive
299	30.53	31.15	29.63	Positive	Positive
300	30.21	30.69	28.87	Positive	Positive
301	33.98	34.07	33.82	Positive
302	26.93	28.71	26.79	Positive	Positive
303	29.31	31.12	29.36	Positive	Positive
304	31.78	32.38	31.33	Positive
305	32.16	32.32	31.25	Positive
306	33.13	33.62	31.63	Positive
307	29.08	30.35	28.84	Positive	Positive
308	Negative			Negative
309	30.71	31.51	29.66	Positive	Positive
310	30.21	31.12	31.19	Positive
311	35.92	32.75	29.34	Positive	Positive
312	32.33	Negative	35.51	Negative
313	33.8	34.91	35	Positive
314	28.69	29.52	27.96	Positive	Positive
315	Negative			Negative
316	28.36	30.04	28.89	Positive	Positive
317	29.36	30.56	29.19	Positive	Positive
318	29.56	30.89	29.33	Positive	Positive
319	Negative			Negative
320	Negative			Negative
321	29.58	31.05	30.02	Positive
322	26.91	28.24	26.78	Positive	Positive
323	30.69	31.51	29.72	Positive	Positive
324	36.35	35.4	33.01	Positive
325	Negative			Negative
326	Negative			Negative
327	Negative			Negative
328	31.14	33.3	31.82	Positive
329	Negative			Negative
330	Negative			Negative
331	Negative			Negative
332	Negative			Negative
333	Negative			Negative
334	Negative			Negative
335	26.18	27.7	25.88	Positive	Positive	Yes
336	14.01	12.88	12.71	Positive	Positive	Yes
337	32.89	35.32	23.66	Positive	Positive
338	Negative			Negative
339	Negative			Negative
340	22.03	22.82	16.9	Positive	Positive	Yes
341	26.75	29.46	35.48	Positive	Positive	Yes
342	33.26	35.75	27.68	Positive	Negative
343	16.58	16.45	35.39	Positive	Positive	Yes
344	26.81	30.4	27.75	Positive	Positive	Yes
345	Negative			Negative
346	Negative			Negative
347	Negative			Negative
348	Negative			Negative
349	Negative			Negative
350	Negative			Negative
351	Negative			Negative
352	Negative			Negative
353	Negative			Negative
354	Negative			Negative
355	Negative			Negative
356	Negative			Negative
357	Negative			Negative
358	Negative			Negative
359	Negative			Negative
360	Negative			Negative
361	Negative			Negative
362	Negative			Negative
363	Negative			Negative
364	Negative			Negative
365	Negative			Negative
366	Negative			Negative
367	Negative			Negative
368	Negative			Negative
369	Negative			Negative
370	Negative			Negative
371	Negative			Negative
372	30.97	29.6	28.14	Positive	Positive
373	34.04	33.32	31.67	Positive
374	36.32	35.41	34.1	Positive
375	33.41	31.98	30.86	Positive
376	31.87	29.96	28.5	Positive	Positive
377	Negative			Negative
378	Negative			Negative
379	30.06	29.16	27.65	Positive	Positive
380	Negative			Negative
381	Negative			Negative
382	Negative			Negative
383	Negative			Negative
384	Negative			Negative
385	30.27	28.54	27.23	Positive	Positive
386	32.96	31.57	30.07	Positive
387	Negative			Negative
388	Negative			Negative
389	Negative			Negative
390	Negative			Negative
391	Negative			Negative
392	Negative			Negative
393	38.78	Negative	Negative	Negative
394	Negative			Negative
395	Negative			Negative
396	30.38	28.8	27.69	Positive	Positive
397	33.92	31.2	30.46	Positive
398	35.7	33.83	31.9	Positive
399	33.86	31.3	29.84	Positive	Positive
400	Negative			Negative
401	34.76	32.19	30.49	Positive
402	Negative			Negative
403	Negative			Negative
404	Negative			Negative
405	33.89	31.43	30.53	Positive
406	33.75	31.7	30.15	Positive
407	38.6	36.94	34.78	Positive
408	Negative			Negative
409	34.94	31.82	30.19	Positive
410	32.7	30.26	28.42	Positive	Positive
411	31.82	29.5	28.25	Positive	Positive
412	35.97	35.09	37.68	Positive
413	36.68	34.37	37.41	Positive
414	Negative			Negative
415	Negative			Negative
416	Negative			Negative
417	Negative			Negative
418	36.91	37.89	Negative	Negative
419	32.94	31.81	33.82	Positive	Positive
420	Negative			Negative
421	34.66	33.37	38.09	Positive	Positive
422	31.7	31.91	33.18	Positive
423	37.84	36.19	Negative	Negative
424	Negative			Negative
425	33.23	33.18	33.41	Positive
426	32.98	32.7	33.93	Positive
427	36	33.47	31.81	Positive
428	33.27	30.75	29.22	Positive	Positive
429	34.36	31.54	29.77	Positive	Positive
430	37.63	35.88	35.29	Positive
431	Negative			Negative
432	Negative			Negative
